# Supplementary figures and images for: Detecting changes in dynamic and complex acoustic environments
Source: eLife journal article supplement (doi:10.7554/elife.24910), 2017-03-06

A

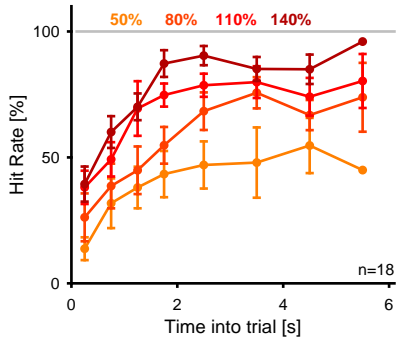

B

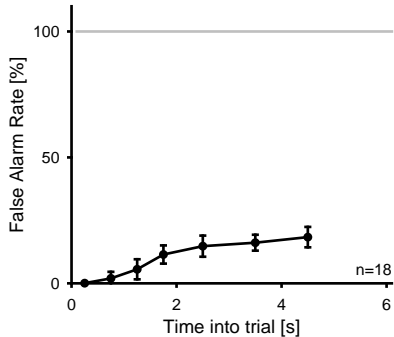

Supplement: supp [file elife-24910-supp-v2.zip]
